# Supplementary material for: Effects of Environmental Concentrations of Total Phosphorus on the Plankton Community Structure and Function in a Microcosm Study
Source: MDPI journal article supplement (doi:10.3390/ijerph19148412), 2022-07-09
Supplement: s1 [file s1]

## **Supplementary Information**

# **Effects of environmental concentrations of total phosphorus on the plankton community structure and function in a microcosm study**

Xue Bai, Zhendong Jiang, Yuan Fang, Lin Zhu, Jianfeng Feng\*

Key Laboratory of Pollution Process and Environmental Criteria of Ministry of Education and  
Tianjin Key Laboratory of Environmental Remediation and Pollution Control, College of  
Environmental Science and Engineering, Nankai University, Tianjin, 300071, P. R. China

Table S1 Algae Group Index (AGI) of the phytoplankton community under different total phosphorus (TP) concentrations.

| Treatment    | Algae Group Index (AGI) |             |              |             |                |              |             |             |
|--------------|-------------------------|-------------|--------------|-------------|----------------|--------------|-------------|-------------|
|              | 7 d                     | 14 d        | 21 d         | 28 d        | 35 d           | 42 d         | 49 d        | 56 d        |
| Control      | 5.20 ± 1.12             | 2.35 ± 0.20 | 5.33 ± 1.91  | 5.61 ± 1.53 | 4.17 ± 1.62    | 1.14 ± 0.21  | 2.27 ± 0.13 | 4.67 ± 1.16 |
| TP 0.10 mg/L | 14.96 ± 3.02 *          | 4.72 ± 1.25 | 3.20 ± 0.85  | 7.33 ± 3.19 | 18.04 ± 4.16 * | 2.19 ± 0.47  | 2.45 ± 0.47 | 2.62 ± 0.38 |
| TP 0.20 mg/L | 14.75 ± 7.85            | 7.73 ± 2.32 | 2.72 ± 0.84  | 3.88 ± 0.80 | 5.80 ± 0.81    | 7.84 ± 3.82  | 2.19 ± 0.26 | 3.65 ± 0.33 |
| TP 0.30 mg/L | 9.50 ± 0.13 *           | 8.29 ± 2.75 | 7.20 ± 2.12  | 4.12 ± 1.14 | 6.62 ± 2.19    | 7.26 ± 2.50  | 4.56 ± 1.51 | 8.01 ± 3.36 |
| TP 0.40 mg/L | 9.55 ± 2.17             | 5.19 ± 2.15 | 11.25 ± 4.12 | 4.95 ± 1.02 | 9.74 ± 0.40 *  | 15.42 ± 4.71 | 2.78 ± 0.45 | 7.76 ± 3.27 |

Note:  $p \leq 0.05$  is marked as \*,  $p \leq 0.01$  is marked as \*\*, and  $p \leq 0.001$  is marked as \*\*\*.

Table S2 Percentages of total variance attributed to time and treatment regime in all principal response curve (PRC) analyses performed in this study. The table also indicates which fraction of the variance explained by treatment regime is captured by first PRC.

| Dataset       | % Variance accounted for by |           |          | % Variance explained by<br>treatment regime (first PRC) |
|---------------|-----------------------------|-----------|----------|---------------------------------------------------------|
|               | Time                        | Treatment | Residual |                                                         |
| Phytoplankton | 24.76%                      | 36.57%    | 38.67%   | 26.47%                                                  |
| Zooplankton   | 52.54%                      | 28.44%    | 19.02%   | 33.52%                                                  |

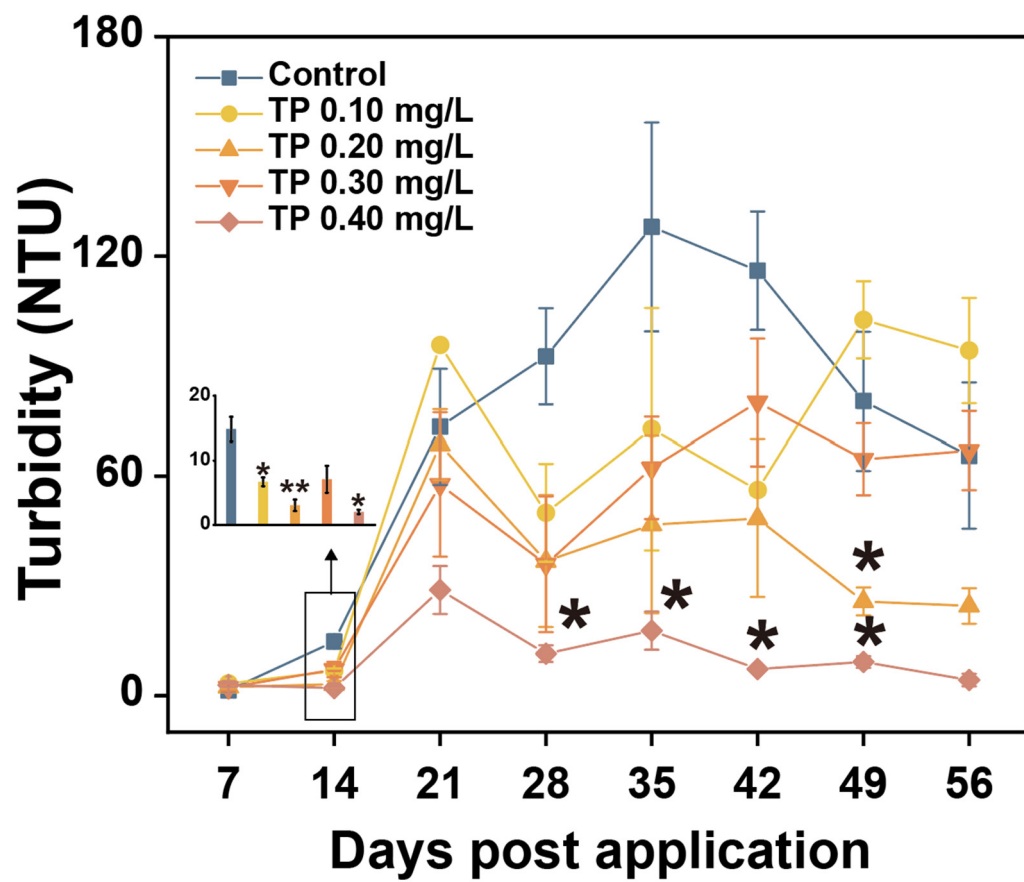

Figure S1. Changes in turbidity under different total phosphorus (TP) concentrations. The bar chart indicated by the arrow represents the changes of turbidity under different TP treatments on day 14.

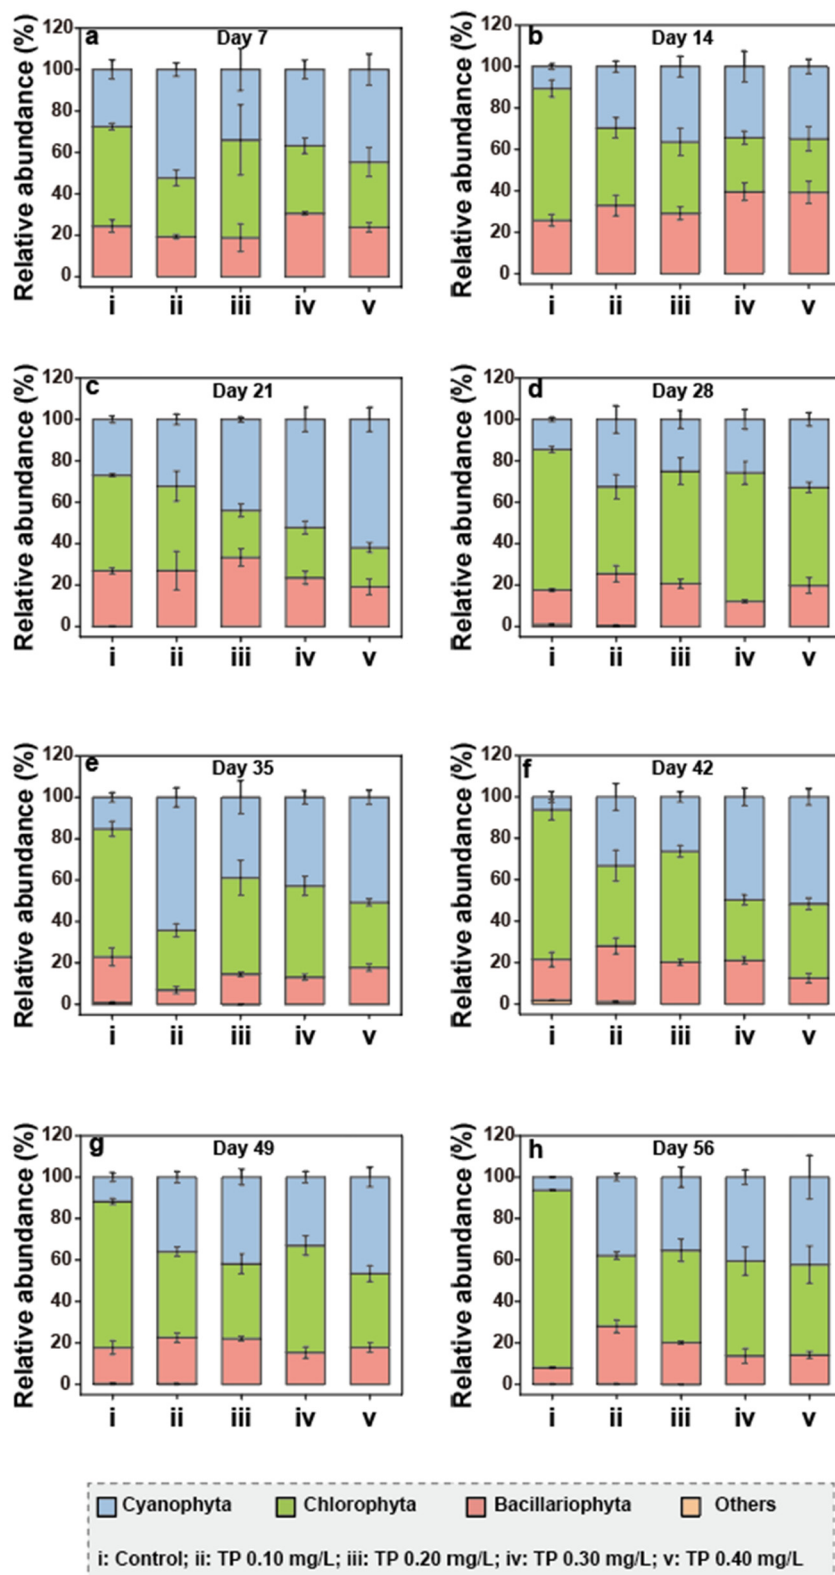

Figure S2. Relative abundances of phytoplankton taxa groups under different TP concentrations.

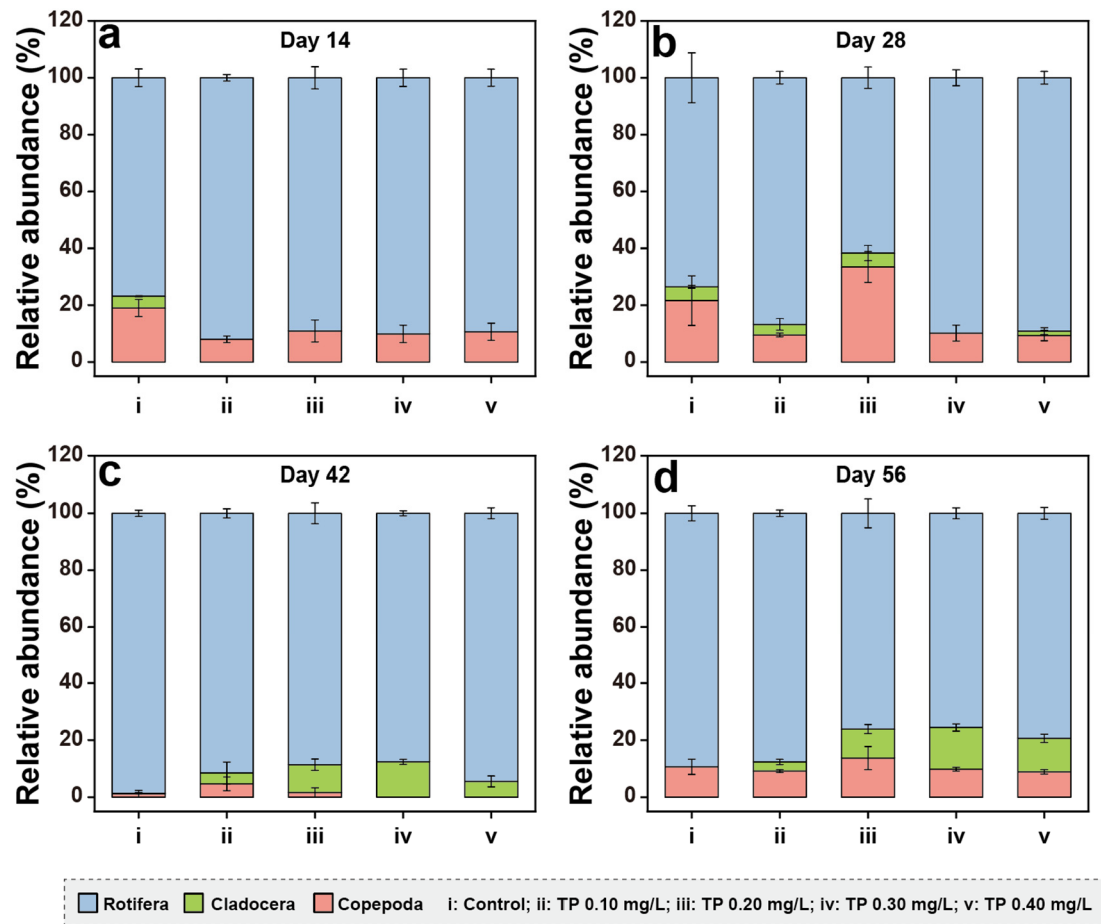

Figure S3. Relative abundances of zooplankton taxa groups under different TP concentrations.
